# Supplementary material
Source: Frontiers journal article supplement (https://www.frontiersin.org/articles/510566)
Supplement: Table_1.XLS [file Table_1.XLS]

## Sheet: rawdatahfov
	patient-ID	VT_kg	gw	bw	f	f_10_12	Amp	MAP	FiO2	CO2	hipo_normo_carbi	DCO2corr	DCO2	MAP_FİO2
	23	2	24	555	12	frekans 12	#NULL!	8	75	22	hipo	#NULL!	#NULL!	0.106667
	32	1.66	23	542	10	frekans 10-11	20	10	70	26	hipo	30.9601	9.09496	0.142857
	35	2	25	580	13	frekans 12	20	10	70	28	hipo	#NULL!	#NULL!	0.142857
	10	1.5	29	1003	10	frekans 10-11	14	8	25	29	hipo	23.494	23.6352	0.32
	42	2	25.4	783	10	frekans 10-11	25	10	21	31	hipo	41.6311	25.5236	0.47619
	32	1.66	23	542	10	frekans 10-11	20	10	70	32	hipo	30.9601	9.09496	0.142857
	3	2	28	1364	10	frekans 10-11	23	10	21	32.3	hipo	40.5375	75.4198	0.47619
	11	1.66	26	1016	10	frekans 10-11	12	10	21	33	hipo	#NULL!	#NULL!	0.47619
	53	1.5	27	1027	10	frekans 10-11	#NULL!	10	21	33	hipo	23.4481	24.7314	0.47619
	37	1.75	24	851	10	frekans 10-11	25	10	35	34	hipo	32.0058	23.1787	0.285714
	49	1.7	25	647	12	frekans 12	16	10	25	34.5	hipo	#NULL!	#NULL!	0.4
	40	1.57	27	912	12	frekans 10-11	14	9	21	35	hipo	30.7811	25.602	0.428571
	41	1.4	25	912	12	frekans 12	16	8	21	35	hipo	24.7223	20.5626	0.380952
	5	1.72	25	870	12	frekans 12	20	12	40	35.4	hipo	#NULL!	#NULL!	0.3
	4	1.75	29	704	10	frekans 10-11	9.98	7	28	36	hipo	32.6427	16.1782	0.25
	11	1.27	26	1016	10	frekans 10-11	12	10	21	36	hipo	17.0978	17.6493	0.47619
	23	2	24	555	12	frekans 12	12	10	80	36	hipo	51.2465	15.7852	0.125
	31	1.78	26	615	11	frekans 10-11	15	11	21	36	hipo	37.4963	14.182	0.52381
	32	1.84	23	542	10	frekans 10-11	25	10	100	36	hipo	37.2601	10.9457	0.1
	37	2	24	851	10	frekans 10-11	9	13	100	36	hipo	41.3808	29.968	0.13
	4	1.5	29	704	10	frekans 10-11	9	7	28	36.6	hipo	24.5177	12.1514	0.25
	41	1.4	25	912	12	frekans 12	20	8	26	36.7	hipo	#NULL!	#NULL!	0.307692
	48	1.35	23	617	12	frekans 12	16	7	24	36.8	hipo	24.4968	9.32567	0.291667
	6	2.16	27	821	10	frekans 10-11	18	11	#NULL!	37	hipo	#NULL!	#NULL!	#NULL!
	11	1.27	26	1016	10	frekans 10-11	11	9	21	37	hipo	17.0978	17.6493	0.428571
	27	1.65	26.3	724	10	frekans 10-11	24	11	21	37	hipo	29.1328	15.2707	0.52381
	35	1.72	25	580	12	frekans 12	15	9	35	37	hipo	38.4735	12.9425	0.257143
	50	1.98	24	740	10	frekans 10-11	16	9	21	37	hipo	41.0302	22.4681	0.428571
	5	1.37	25	870	10	frekans 10-11	20	10	21	37.1	hipo	20.0902	15.2063	0.47619
	48	1.1	23	617	12	frekans 12	14	7	25	37.3	hipo	#NULL!	#NULL!	0.28
	39	2	27	1150	10	frekans 10-11	20	9	21	37.7	hipo	40.7561	53.9	0.428571
	24	1.72	29	1320	10	frekans 10-11	20	9	21	38	hipo	30.1579	52.5472	0.428571
	26	1.31	28	1140	13	frekans 12	25	12	33	38	hipo	23.0788	29.9932	0.363636
	35	1.55	25	580	12	frekans 12	10	9	30	38	hipo	31.8027	10.6984	0.3
	36	2	27	802	10	frekans 10-11	18	9	21	38	hipo	41.5547	26.7282	0.428571
	13	1.5	26	927	10	frekans 10-11	15	9	#NULL!	38.1	hipo	23.6637	20.3349	#NULL!
	16	1.34	29	893	10	frekans 10-11	20	9	24	38.2	hipo	19.21	15.319	0.375
	15	2	30	861	10	frekans 10-11	15	13	#NULL!	38.5	#NULL!	41.3489	30.6528	#NULL!
	50	1.94	24	740	10	frekans 10-11	13	9	21	38.5	hipo	39.4622	21.6095	0.428571
	5	1.37	25	870	10	frekans 10-11	20	10	23	38.6	hipo	20.0902	15.2063	0.434783
	2	1.86	24.5	1060	10	frekans 10-11	13	7	21	38.7	hipo	35.486	39.8721	0.333333
	30	1.7	24	651	12	frekans 12	10	9	25	38.8	hipo	#NULL!	#NULL!	0.36
	51	1.4	24	693	10	frekans 10-11	20	14	30	38.8	hipo	21.6823	10.4129	0.466667
	4	1.5	29	704	10	frekans 10-11	10	7	28	39	hipo	24.5177	12.1514	0.25
	25	1.96	28	1320	11	frekans 10-11	21	14	45	39	hipo	42.8315	74.6296	0.311111
	30	1.6	24	651	12	frekans 12	12	10	45	39	hipo	33.0796	14.0192	0.222222
	44	1.5	30	#NULL!	10	frekans 10-11	13	10	#NULL!	39.4	hipo	#NULL!	#NULL!	#NULL!
	2	1.86	28	1060	10	frekans 10-11	15	7	21	39.8	hipo	35.486	39.8721	0.333333
	30	2	24	651	12	frekans 12	11	11	30	39.9	hipo	#NULL!	#NULL!	0.366667
	2	1.86	24.5	1060	10	frekans 10-11	10	7	21	40	hipo	35.486	39.8721	0.333333
	30	1.7	24	651	12	frekans 12	13	9	40	40	hipo	37.0396	15.6974	0.225
	40	1.57	27	912	12	frekans 10-11	15	10	30	40	hipo	30.7811	25.602	0.333333
	50	1.86	24	740	10	frekans 10-11	14	9	21	40	hipo	#NULL!	#NULL!	0.428571
	52	1.96	24	737	10	frekans 10-11	21.3	10	35	40	hipo	#NULL!	#NULL!	0.285714
	40	1.4	27	710	10	frekans 10-11	16	11	25	40.1	normo	#NULL!	#NULL!	0.44
	49	1.7	25	647	12	frekans 12	16	10	25	40.2	normo	#NULL!	#NULL!	0.4
	16	1.41	29	893	10	frekans 10-11	21	9	24	40.5	normo	21.135	16.8541	0.375
	5	1.5	25	870	10	frekans 10-11	20	12	30	40.8	normo	23.8212	18.0302	0.4
	41	1.5	25	912	12	frekans 12	16	7.5	21	40.8	normo	#NULL!	#NULL!	0.357143
	52	1.96	24	737	10	frekans 10-11	21	10	35	40.9	normo	40.257	21.8664	0.285714
	22	1.9	24	580	10	frekans 10-11	15	10	21	41	normo	39.0727	13.144	0.47619
	26	1.52	28	1140	13	frekans 12	25	12	33	41	normo	30.8047	40.0337	0.363636
	33	1.5	29	401	10	frekans 10-11	16	11	47	41	normo	#NULL!	#NULL!	0.234043
	39	1.9	27	1150	10	frekans 10-11	18.1	9	21	41	normo	36.8561	48.7422	0.428571
	45	1.86	#NULL!	1376	10	frekans 10-11	15	12	25	41	normo	35.1242	66.5032	0.48
	48	1.3	23	617	12	frekans 12	12	7	25	41	normo	22.9068	8.72037	0.28
	5	1	25	870	10	frekans 10-11	20	8	34	41.2	normo	11.3212	8.569	0.235294
	3	1.37	28	1364	10	frekans 10-11	18	10	21	41.4	normo	19.3065	35.9196	0.47619
	48	1.1	23	617	12	frekans 12	10	7	25	41.4	normo	#NULL!	#NULL!	0.28
	21	1.5	26	1039	10	frekans 10-11	35	10	21	41.7	normo	23.4263	25.2892	0.47619
	5	1.5	25	870	12	frekans 12	20	12	40	41.8	normo	28.3212	21.4363	0.3
	18	2.38	28	921	10	frekans 10-11	#NULL!	12	23	41.8	normo	#NULL!	#NULL!	0.521739
	49	1.3	25	647	12	frekans 12	16	10	25	41.9	normo	22.6689	9.48939	0.4
	2	1.75	28	1060	10	frekans 10-11	11.21	7	21	42	normo	31.515	35.4102	0.333333
	9	1.45	28	1240	10	frekans 10-11	#NULL!	10	#NULL!	42	normo	21.6754	33.328	#NULL!
	11	1.27	26	1016	10	frekans 10-11	11	10	21	42	normo	17.0978	17.6493	0.47619
	13	1.7	26	927	10	frekans 10-11	13	9	#NULL!	42	normo	30.0637	25.8346	#NULL!
	15	1.9	30	861	10	frekans 10-11	#NULL!	15	#NULL!	42	normo	#NULL!	#NULL!	#NULL!
	25	1.72	28	1320	11	frekans 10-11	21	15	45	42	normo	33.1163	57.7019	0.333333
	26	1.86	28	1140	10	frekans 10-11	25	12	30	42	normo	35.3655	45.961	0.4
	31	1.78	26	615	10	frekans 10-11	20	11	55	42	normo	#NULL!	#NULL!	0.2
	7	1.66	27	1080	10	frekans 10-11	15	8	21	42.1	normo	28.4133	33.1413	0.380952
	15	1.57	30	861	10	frekans 10-11	14	13	#NULL!	42.1	normo	25.9979	19.2728	#NULL!
	49	1.45	25	647	12	frekans 12	16	10	25	42.4	normo	#NULL!	#NULL!	0.4
	41	1.55	25	912	12	frekans 12	18	8	21	42.6	normo	30.0323	24.9792	0.380952
	8	1.55	28.2	1140	12	frekans 12	10	8.5	30	43	normo	29.5995	38.4675	0.283333
	28	1.5	25	618	12	frekans 12	20	10	21	43	normo	#NULL!	#NULL!	0.47619
	40	1.75	27	912	10	frekans 10-11	16	11	25	43	normo	31.8273	26.4722	0.44
	44	1.6	30	#NULL!	10	frekans 10-11	9	10	#NULL!	43	normo	#NULL!	#NULL!	#NULL!
	48	0.98	23	617	12	frekans 12	12	7	30	43	normo	#NULL!	#NULL!	0.233333
	16	1.7	29	893	10	frekans 10-11	20	9	24	43.1	normo	30.154	24.0463	0.375
	51	1.5	24	693	10	frekans 10-11	20	14	25	43.2	normo	24.5823	11.8056	0.56
	5	0.98	25	870	10	frekans 10-11	20	10	25	43.4	normo	10.9252	8.26927	0.4
	17	2	30	879	10	frekans 10-11	25	9	50	43.4	normo	41.2943	31.9056	0.18
	43	1.49	26	808	10	frekans 10-11	12	8	30	43.5	normo	#NULL!	#NULL!	0.266667
	27	1.37	26.3	724	9	frekans 10-11	21	10	40	43.8	normo	18.7999	9.85443	0.25
	51	1.7	24	693	10	frekans 10-11	20	11	35	43.9	normo	30.9823	14.8792	0.314286
	5	1.49	25	870	12	frekans 12	20	12	30	44	normo	27.9624	21.1647	0.4
	9	1.81	28	1240	10	frekans 10-11	#NULL!	10	#NULL!	44	normo	33.4114	51.3733	#NULL!
	12	1.72	24	601	10	frekans 10-11	16	11	35	44	normo	32.3525	11.6858	0.314286
	23	1.65	24	555	12	frekans 12	14	10	60	44	normo	35.9165	11.0632	0.166667
	27	1.86	26.3	724	9	frekans 10-11	21	13	40	44	normo	#NULL!	#NULL!	0.325
	32	1.9	23	542	10	frekans 10-11	25	10	70	44	normo	39.5041	11.6049	0.142857
	42	1.5	25.4	783	12	frekans 12	20	11	40	44	normo	#NULL!	#NULL!	0.275
	38	1.84	27.3	851	11	frekans 10-11	30	11	21	44.3	normo	38.6224	27.9704	0.52381
	43	1.69	26	808	10	frekans 10-11	16	11	21	44.3	normo	30.0927	19.6464	0.52381
	26	1.5	28	1140	13	frekans 12	#NULL!	12	25	44.4	normo	30.0195	39.0133	0.48
	43	1.41	26	808	10	frekans 10-11	16	11	21	44.7	normo	21.4127	13.9796	0.52381
	16	1.3	29	893	10	frekans 10-11	17	8	25	44.8	normo	18.154	14.4769	0.32
	11	1.47	26	1016	10	frekans 10-11	10	10	28	44.9	normo	22.5778	23.306	0.357143
	12	1.47	24	601	10	frekans 10-11	18	15	24	45	normo	24.3775	8.80519	0.625
	28	1.3	25	618	12	frekans 12	18	10	23	45	normo	22.8983	8.74542	0.434783
	33	1.54	29	401	10	frekans 10-11	16	11	50	45	normo	#NULL!	#NULL!	0.22
	34	1.83	26.6	765	10	frekans 10-11	15	10	29	45	normo	35.1977	20.5986	0.344828
	37	1.75	24	851	10	frekans 10-11	10	10	35	45	normo	32.0058	23.1787	0.285714
	46	1.75	27	611	10	frekans 10-11	25	10	35	45	normo	#NULL!	#NULL!	0.285714
	46	1.5	27	611	10	frekans 10-11	18	8	35	45	normo	25.1787	9.39972	0.228571
	52	1.75	24	737	10	frekans 10-11	12	10	35	45.1	normo	32.466	17.6346	0.285714
	43	1.75	26	808	10	frekans 10-11	14	8	30	45.7	normo	32.1567	20.994	0.266667
	50	1.97	24	740	10	frekans 10-11	11	9	21	45.7	normo	40.6352	22.2518	0.428571
	30	1.5	24	651	12	frekans 12	13	9	24	45.9	normo	29.3596	12.4426	0.375
	49	1.45	25	647	12	frekans 12	20	8	35	45.9	normo	27.6189	11.5615	0.228571
	10	1.65	29	1003	10	frekans 10-11	12	9	25	46	normo	28.219	28.3886	0.36
	15	1	30	861	10	frekans 10-11	16	13	#NULL!	46	normo	11.3489	8.41321	#NULL!
	19	1.75	32	1490	10	frekans 10-11	18	13	21	46	normo	31.0754	68.9906	0.619048
	26	1.79	28	1140	13	frekans 12	#NULL!	12	25	46	normo	42.4228	55.1326	0.48
	27	1.79	26.3	724	9	frekans 10-11	21	10	40	46	normo	30.7447	16.1156	0.25
	27	1.55	26.3	724	9	frekans 10-11	21	13	40	46	normo	23.5303	12.334	0.325
	35	1.48	25	580	12	frekans 12	13	9	30	46	normo	29.2575	9.84221	0.3
	35	1.57	25	580	12	frekans 12	12	9	35	46	normo	#NULL!	#NULL!	0.257143
	36	1.75	27	802	10	frekans 10-11	14	9	21	46	normo	32.1797	20.6981	0.428571
	41	1.4	25	912	12	frekans 12	15	7.5	21	46	normo	24.7223	20.5626	0.357143
	41	1.9	25	912	12	frekans 12	18	8	25	46	normo	44.5223	37.0312	0.32
	45	1.4	32	1376	10	frekans 10-11	15	12	25	46	normo	20.1282	38.1102	0.48
	48	1.1	23	617	12	frekans 12	10	7	40	46	normo	17.1468	6.5276	0.175
	48	1.25	23	617	12	frekans 12	16	7	25	46	normo	21.3768	8.13792	0.28
	53	1.55	27	1027	10	frekans 10-11	22	11	21	46	normo	24.9731	26.3399	0.52381
	22	1.75	24	580	10	frekans 10-11	18	10	23	46.8	normo	33.5977	11.3023	0.434783
	22	2.06	24	580	10	frekans 10-11	5.15	9	21	46.8	normo	45.4087	15.2755	0.428571
	51	1.4	24	693	10	frekans 10-11	20	10	70	46.8	normo	#NULL!	#NULL!	0.142857
	47	2.03	32	1460	10	frekans 10-11	14	13	21	46.9	normo	#NULL!	#NULL!	0.619048
	15	2	30	861	8	frekans 10-11	15	15	40	47	normo	33.3489	24.7223	0.375
	29	1.8	29	1500	10	frekans 10-11	25	8	24	47	normo	32.8444	73.9	0.333333
	40	1.4	27	912	10	frekans 10-11	12	10	25	47	normo	#NULL!	#NULL!	0.4
	5	1.75	25	870	12	frekans 12	20	12	40	47.3	normo	38.0712	28.8161	0.3
	19	1.4	32	1490	10	frekans 10-11	19.4	13	21	47.3	normo	20.0504	44.514	0.619048
	47	1.72	32	1460	10	frekans 10-11	16	13	21	47.4	normo	30.0531	64.0613	0.619048
	7	1.8	27	1080	10	frekans 10-11	16	8	21	47.6	normo	33.2573	38.7914	0.380952
	45	1.9	32	1376	10	frekans 10-11	20	12	25	47.6	normo	36.6282	69.3509	0.48
	3	1.43	28	1364	10	frekans 10-11	12	10	21	48	normo	20.9865	39.0453	0.47619
	6	1.5	27	821	10	frekans 10-11	#NULL!	11	#NULL!	48	normo	23.9836	16.1659	#NULL!
	10	1.51	29	1003	10	frekans 10-11	16	9	30	48	normo	23.795	23.938	0.3
	12	1.57	24	601	10	frekans 10-11	14	11	32	48	normo	27.4175	9.90324	0.34375
	14	1.65	26.3	876	10	frekans 10-11	16	12	21	48	normo	28.5281	21.8918	0.571429
	24	1.9	29	1453	10	frekans 10-11	20	12	30	48	normo	#NULL!	#NULL!	0.4
	26	1.57	28	1140	10	frekans 10-11	30	13	70	48	normo	25.4185	33.0338	0.185714
	27	1.9	26.3	724	9	frekans 10-11	13	13	35	48	normo	34.3978	18.0305	0.371429
	27	1.65	26.3	724	9	frekans 10-11	21	10	40	48	normo	26.4103	13.8436	0.25
	36	1.65	27	802	10	frekans 10-11	12	9	21	48	normo	28.7797	18.5112	0.428571
	41	1.75	25	912	12	frekans 12	18	8	25	48	normo	37.9523	31.5666	0.32
	16	1.2	29	893	10	frekans 10-11	17	8	30	48.1	normo	15.654	12.4833	0.266667
	24	1.34	29	1320	10	frekans 10-11	18	9	21	48.2	normo	18.5299	32.2865	0.428571
	5	1.21	25	870	10	frekans 10-11	20	10	25	48.4	normo	15.9622	12.0818	0.4
	43	1.26	26	808	10	frekans 10-11	14	11	21	48.4	normo	17.4077	11.3649	0.52381
	17	2	30	879	10	frekans 10-11	25	10	50	48.6	normo	41.2943	31.9056	0.2
	21	1.23	26	1039	10	frekans 10-11	20	8.5	21	48.6	normo	#NULL!	#NULL!	0.404762
	18	2.28	28	921	10	frekans 10-11	#NULL!	12	23	48.7	normo	53.1629	45.095	0.521739
	24	1.73	29	1320	10	frekans 10-11	12	10	21	48.7	normo	30.5029	53.1483	0.47619
	38	2	27.3	851	11	frekans 10-11	30	11	#NULL!	48.8	normo	45.3808	32.8648	#NULL!
	47	1.8	32	1460	10	frekans 10-11	12	13	21	48.9	normo	32.8691	70.0638	0.619048
	12	1.47	24	601	10	frekans 10-11	15	11	38	49	normo	24.3775	8.80519	0.289474
	20	1.4	25	670	10	frekans 10-11	30	10	21	49	normo	21.8277	9.79844	0.47619
	22	1.47	24	580	10	frekans 10-11	14	10	23	49	normo	24.5817	8.26927	0.434783
	29	1.75	29	1500	10	frekans 10-11	#NULL!	9	33	49	normo	31.0694	69.9062	0.272727
	32	1.8	23	542	11	frekans 10-11	20	10	50	49	normo	39.0441	11.4697	0.2
	40	2.1	27	912	10	frekans 10-11	15	11	25	49	normo	45.3023	37.6799	0.44
	44	1.84	30	#NULL!	10	frekans 10-11	12	10	#NULL!	49	normo	#NULL!	#NULL!	#NULL!
	48	1.1	23	617	12	frekans 12	14	8	40	49	normo	#NULL!	#NULL!	0.2
	51	1.4	24	693	10	frekans 10-11	20	10	30	49.2	normo	#NULL!	#NULL!	0.333333
	43	1.73	26	808	10	frekans 10-11	14	9	30	49.3	normo	31.4607	20.5396	0.3
	36	1.65	27	802	10	frekans 10-11	#NULL!	9	21	49.4	normo	#NULL!	#NULL!	0.428571
	49	1.25	25	647	12	frekans 12	16	10	25	49.4	normo	21.1389	8.84892	0.4
	21	1.7	26	1039	10	frekans 10-11	40	11	30	49.7	normo	29.8263	32.1982	0.366667
	20	1.82	25	670	10	frekans 10-11	30	9.5	21	49.8	normo	35.3517	15.8694	0.452381
	12	1.65	24	601	10	frekans 10-11	20	11	40	50	normo	29.9935	10.8337	0.275
	23	1.67	24	555	12	frekans 12	12	10	70	50	normo	36.7133	11.3086	0.142857
	27	1.81	26.3	724	9	frekans 10-11	21	13	40	50	normo	31.3927	16.4553	0.325
	27	1.65	26.3	724	9	frekans 10-11	21	13	40	50	normo	#NULL!	#NULL!	0.325
	41	1.45	25	912	12	frekans 12	16	7.5	21	50	normo	26.4323	21.9849	0.357143
	42	1.75	25.4	783	10	frekans 10-11	29	13	21	50	normo	32.2561	19.7759	0.619048
	48	0.97	23	617	12	frekans 12	10	7	25	50.2	normo	#NULL!	#NULL!	0.28
	6	1.36	27	821	10	frekans 10-11	14	11	#NULL!	50.3	normo	#NULL!	#NULL!	#NULL!
	24	2	29	1320	10	frekans 10-11	10	11	21	50.3	normo	#NULL!	#NULL!	0.52381
	43	1.9	26	808	10	frekans 10-11	20	11	21	50.3	normo	37.6317	24.5684	0.52381
	24	2	29	1320	10	frekans 10-11	14	10	21	50.6	normo	#NULL!	#NULL!	0.47619
	5	1.52	25	870	10	frekans 10-11	20	10	25	50.7	normo	24.4252	18.4874	0.4
	51	1.5	24	693	10	frekans 10-11	20	10	32	50.7	normo	#NULL!	#NULL!	0.3125
	8	1.7	28.2	1140	12	frekans 12	20	9.5	36	51	normo	35.4495	46.0701	0.263889
	35	1.65	25	580	12	frekans 12	10	10	40	51	normo	35.6427	11.9902	0.25
	18	2.06	28	921	10	frekans 10-11	#NULL!	12	25	51.2	normo	43.6149	36.996	0.48
	49	1.5	25	647	12	frekans 12	20	11	35	51.3	normo	29.3889	12.3024	0.314286
	1	1.42	24.5	600	12	frekans 12	10	10	30	51.45	normo	26.9746	9.71085	0.333333
	30	2	24	651	12	frekans 12	12	11	35	51.5	normo	50.3596	21.3424	0.314286
	21	1.63	26	1039	10	frekans 10-11	38	8.5	31	51.7	normo	27.4953	29.6818	0.274194
	43	1.68	26	808	10	frekans 10-11	18	9	30	51.8	normo	29.7557	19.4264	0.3
	30	1.95	24	651	12	frekans 12	14	11	35	52	normo	#NULL!	#NULL!	0.314286
	30	2	24	651	12	frekans 12	12	11	35	52	normo	#NULL!	#NULL!	0.314286
	44	1.47	30	#NULL!	10	frekans 10-11	15	10	#NULL!	52	normo	#NULL!	#NULL!	#NULL!
	53	1.47	27	1027	10	frekans 10-11	20	10	21	52	normo	22.5571	23.7916	0.47619
	8	1.52	28.2	1140	12	frekans 12	12	9.5	32	52.5	normo	28.4943	37.0312	0.296875
	24	1.65	29	1320	10	frekans 10-11	20	12	21	52.6	normo	27.7989	48.4368	0.571429
	49	1.4	25	647	12	frekans 12	16	10	28	52.8	normo	25.9089	10.8457	0.357143
	8	1.7	28.2	1140	12	frekans 12	12	8.5	40	52.9	normo	35.4495	46.0701	0.2125
	31	1.7	26	615	11	frekans 10-11	15	11	21	53	normo	34.4339	13.0238	0.52381
	40	1.7	27	912	10	frekans 10-11	14	11	26	53	normo	30.1023	25.0374	0.423077
	49	1.27	25	647	12	frekans 12	16	10	25	53	normo	21.7437	9.10209	0.4
	49	1.25	25	647	12	frekans 12	16	10	25	53	normo	21.1389	8.84892	0.4
	33	1.5	29	401	10	frekans 10-11	16	10	50	53.5	normo	#NULL!	#NULL!	0.2
	49	1.4	25	647	12	frekans 12	20	11	25	53.6	normo	#NULL!	#NULL!	0.44
	47	1.78	32	1460	10	frekans 10-11	16	13	21	53.9	normo	32.1531	68.5376	0.619048
	5	1.14	25	870	10	frekans 10-11	20	10	25	54	normo	#NULL!	#NULL!	0.4
	6	1.88	27	821	10	frekans 10-11	17.7	11	#NULL!	54	normo	36.8276	24.8233	#NULL!
	23	1.81	24	555	12	frekans 12	12	10	70	54	normo	42.5597	13.1094	0.142857
	17	1.4	30	879	12	frekans 12	25	10	44	54.4	normo	24.8143	19.1725	0.227273
	1	1.5	24.5	600	12	frekans 12	14	11	35	54.5	normo	29.7778	10.72	0.314286
	33	1.8	29	401	10	frekans 10-11	16	10	60	54.5	normo	43.5321	7	0.166667
	8	1.5	28.2	1140	12	frekans 12	10	9.5	30	55	normo	27.7695	36.0892	0.316667
	34	1.83	26.6	765	9	frekans 10-11	15	10	29	55	normo	31.8488	18.6387	0.344828
	41	1.83	25	912	10	frekans 10-11	16	10	28	55	normo	34.6913	28.8543	0.357143
	45	1.75	32	1376	10	frekans 10-11	18	12	25	55	normo	31.1532	58.9846	0.48
	47	1.63	32	1460	10	frekans 10-11	16.9	13	21	55	normo	27.0381	57.6345	0.619048
	52	1.27	24	737	10	frekans 10-11	20	10	30	55	normo	17.97	9.76077	0.333333
	38	1.64	27.3	851	10	frekans 10-11	25	10	21	55.4	hiper	28.2768	20.4781	0.47619
	30	1.9	24	651	12	frekans 12	10	11	35	55.6	hiper	45.6796	19.3591	0.314286
	3	1.43	28	1364	10	frekans 10-11	15	10	21	56	hiper	20.9865	39.0453	0.47619
	14	2	26.3	876	10	frekans 10-11	18	12	21	56	hiper	41.3031	31.695	0.571429
	45	1.86	32	1376	10	frekans 10-11	15	12	25	56	hiper	#NULL!	#NULL!	0.48
	21	1.63	26	1039	10	frekans 10-11	18	8.5	28	56.1	hiper	27.4953	29.6818	0.303571
	1	1.25	24.5	600	10	frekans 10-11	20	12	25	56.3	hiper	#NULL!	#NULL!	0.48
	24	1.65	29	1320	10	frekans 10-11	20	12	30	56.6	hiper	27.7989	48.4368	0.4
	24	1.65	29	1320	10	frekans 10-11	20	12	30	57	hiper	27.7989	48.4368	0.4
	30	1.5	24	651	10	frekans 10-11	16	9	30	57	hiper	24.8596	10.5355	0.3
	37	1.75	24	455	10	frekans 10-11	15	14	100	57	hiper	#NULL!	#NULL!	0.14
	21	1.82	26	1039	10	frekans 10-11	40	13	30	57.6	hiper	34.0503	36.7581	0.433333
	8	1.7	28.2	1140	12	frekans 12	16	9	45	58	hiper	35.4495	46.0701	0.2
	8	1.7	28.2	1140	12	frekans 12	8	9.5	35	58	hiper	35.4495	46.0701	0.271429
	20	1.64	25	670	10	frekans 10-11	30	9.5	21	58	hiper	29.1237	13.0736	0.452381
	29	1.5	29	1500	10	frekans 10-11	#NULL!	9	30	58	hiper	22.9444	51.625	0.3
	30	1.75	24	651	12	frekans 12	14	11	35	58	hiper	39.1096	16.5747	0.314286
	34	1.83	26.6	765	10	frekans 10-11	15	10	29	58	hiper	35.1977	20.5986	0.344828
	5	1.72	25	870	10	frekans 10-11	20	12	30	58.1	hiper	30.9052	23.3921	0.4
	38	1.88	27.3	851	10	frekans 10-11	25	11	25	58.3	hiper	36.7248	26.5962	0.44
	14	1.9	26.3	876	10	frekans 10-11	13.48	12	21	58.6	hiper	37.4031	28.7023	0.571429
	24	1.65	29	1320	10	frekans 10-11	18	12	21	59	hiper	27.7989	48.4368	0.571429
	29	1.5	29	1500	10	frekans 10-11	25	9	30	59	hiper	22.9444	51.625	0.3
	39	1.76	27	1150	10	frekans 10-11	15	10	21	59	hiper	#NULL!	#NULL!	0.47619
	24	2	29	1320	10	frekans 10-11	16	9	21	59.5	hiper	#NULL!	#NULL!	0.428571
	49	1.54	25	647	12	frekans 12	16	11	25	59.9	hiper	30.8481	12.9133	0.44
	32	1.86	23	542	10	frekans 10-11	20	10	50	60	hiper	38.0001	11.1631	0.2
	33	1.25	29	401	10	frekans 10-11	14	10	55	60	hiper	#NULL!	#NULL!	0.181818
	34	2	26.6	765	9	frekans 10-11	15	9	30	60	hiper	37.7087	22.0681	0.3
	17	2	30	879	10	frekans 10-11	25	9	50	60.4	hiper	#NULL!	#NULL!	0.18
	1	1.25	24.5	600	12	frekans 12	12	10	50	60.5	hiper	#NULL!	#NULL!	0.2
	25	1.66	28	1320	10	frekans 10-11	25	11	50	61	hiper	28.1299	49.0136	0.22
	39	1.76	27	1150	10	frekans 10-11	10	10	21	61	hiper	31.7321	41.9658	0.47619
	40	1.4	27	912	10	frekans 10-11	10	10	30	61	hiper	20.8023	17.3022	0.333333
	17	2	30	879	10	frekans 10-11	25	10	50	62.4	hiper	#NULL!	#NULL!	0.2
	21	1.82	26	1039	10	frekans 10-11	40	12	30	62.6	hiper	#NULL!	#NULL!	0.4
	18	1.75	28	921	10	frekans 10-11	18.7	12	25	63.5	hiper	31.8039	26.9774	0.48
	21	1.53	26	1039	10	frekans 10-11	40	13	40	63.6	hiper	24.3353	26.2705	0.325
	30	1.5	24	651	12	frekans 12	16	11	35	64	hiper	#NULL!	#NULL!	0.314286
	51	1.15	24	693	10	frekans 10-11	20	14	30	64.1	hiper	15.3073	7.35129	0.466667
	25	1.5	28	1320	13	frekans 12	22	13	50	65	hiper	29.8239	51.9652	0.26
	12	1.66	24	601	10	frekans 10-11	16	11	32	67	hiper	30.3245	10.9533	0.34375
